# Supplementary material
Source: publisher figshare collection journal article supplement (https://frontiersin.figshare.com/ndownloader/files/16342292)
Supplement: Supplementary file [file 16342292]

The Role of Emotional Intelligence in the Maintenance of Depression  
Symptoms and Loneliness Among Children

<https://www.frontiersin.org/articles/10.3389/fpsyg.2019.01672/full#supplementary-material>

**Supplementary Materials I**

Table S1. Bootstrapped Step-wise Regression Analysis with AEI and TEI as predictors of Prolonged Loneliness for Boys and Girls.

| Time 1 Measures    | Boys                                                                            |        |          |                   | Girls                                                                          |        |          |                  |
|--------------------|---------------------------------------------------------------------------------|--------|----------|-------------------|--------------------------------------------------------------------------------|--------|----------|------------------|
|                    | B                                                                               | SE B   | <i>P</i> | CI                | B                                                                              | SE B   | <i>p</i> | CI               |
| <b>Step 1</b>      |                                                                                 |        |          |                   |                                                                                |        |          |                  |
| Constant           | -93.96                                                                          | 671.11 | .883     | -1533.22, 1129.74 | -698.30                                                                        | 697.55 | .307     | -2175.92, 681.05 |
| AEI Perceiving     | -2.76                                                                           | 4.72   | .543     | -13.31, 6.10      | -11.96                                                                         | 9.42   | .223     | -33.19, 1.81     |
| Emotions           |                                                                                 |        |          |                   |                                                                                |        |          |                  |
| AEI Using emotions | 23.53                                                                           | 7.60   | .003     | 11.61, 40.09      | 21.38                                                                          | 7.33   | .011     | 9.90, 38.13      |
| AEI Understanding  | -19.24                                                                          | 7.60   | .014     | -35.15, -3.54     | -7.55                                                                          | 8.58   | .351     | -26.53, 6.04     |
| Emotions           |                                                                                 |        |          |                   |                                                                                |        |          |                  |
| AEI Managing       | 7.92                                                                            | 13.42  | .550     | -19.25, 33.311    | 11.16                                                                          | 8.97   | .178     | -4.26, 31.10     |
| Emotions           |                                                                                 |        |          |                   |                                                                                |        |          |                  |
|                    | F = 11.18, <i>p</i> < .001, R <sup>2</sup> = .29, Adjusted R <sup>2</sup> = .27 |        |          |                   | F = 5.19, <i>p</i> < .001, R <sup>2</sup> = .18, Adjusted R <sup>2</sup> = .15 |        |          |                  |

|                                                           |         |         |      |                   |                                                           |        |      |                   |
|-----------------------------------------------------------|---------|---------|------|-------------------|-----------------------------------------------------------|--------|------|-------------------|
| Step 2                                                    |         |         |      |                   |                                                           |        |      |                   |
| Constant                                                  | 525.18  | 1011.83 | .589 | -1642.97, 2385.58 | 628.47                                                    | 947.49 | .525 | -1329.06, 2406.76 |
| AEI Perceiving                                            | -.72    | 4.84    | .856 | -10.20, 10.52     | -10.20                                                    | 7.93   | .180 | -28.98, .76       |
| Emotions                                                  |         |         |      |                   |                                                           |        |      |                   |
| AEI Using emotions                                        | 21.97   | 7.89    | .007 | 9.84, 40.24       | 20.31                                                     | 7.07   | .008 | 8.61, 36.73       |
| AEI Understanding                                         | -20.74  | 7.38    | .010 | -36.45, -6.75     | -11.44                                                    | 8.99   | .184 | -30.91, 4.25      |
| Emotions                                                  |         |         |      |                   |                                                           |        |      |                   |
| AEI Managing                                              | 10.12   | 13.30   | .450 | -17.24, 36.20     | 19.05                                                     | 8.28   | .018 | 3.77, 36.70       |
| Emotions                                                  |         |         |      |                   |                                                           |        |      |                   |
| Global TEI                                                | -204.21 | 213.85  | .361 | -656.72, 177.53   | -503.08                                                   | 194.24 | .012 | -884.93, -122.87  |
| F = 9.38, $p < .001$ , $R^2 = .31$ , Adjusted $R^2 = .27$ |         |         |      |                   | F = 7.65, $p < .001$ , $R^2 = .29$ , Adjusted $R^2 = .25$ |        |      |                   |

Notes: AEI = Ability Emotional Intelligence; TEI = Trait Emotional Intelligence
